# Supplementary material
Source: publisher figshare collection journal article supplement (https://acs.figshare.com/ndownloader/files/20201754)
Supplement: Supplementary file 1 [file 20201754]

## Sheet: Sheet1
	Number in Figure 1B	Opsin	Organism	Fraction	Amino acid sequence	Genbank accession number
	1	Archaerhodopsin-3 (AR3)	Halorubrum sodomense	Archaeon	MDPIALQAGYDLLGDGRPETLWLGIGTLLMLIGTFYFLVRGWGVTDKDAREYYAVTILVPGIASAAYLSMFFGIGLTEVTVGGEMLDIYYARYADWLFTTPLLLLDLALLAKVDRVTIGTLVGVDALMIVTGLIGALSHTAIARYSWWLFSTICMIVVLYFLATSLRSAAKERGPEVASTFNTLTALVLVLWTAYPILWIIGTEGAGVVGLGIETLLFMVLDVTAKVGFGFILLRSRAILGDTEAPEPSAGADVSAAD	WP_092921078
	2	Bacteriorhodopsin (BR)	Halobacterium salinarum	Archaeon	QAQITGRPEWIWLALGTALMGLGTLYFLVKGMGVSDPDAKKFYAITTLVPAIAFTMYLSMLLGYGLTMVPFGGEQNPIYWARYADWLFTTPLLLLDLALLVDADQGTILALVGADGIMIGTGLVGALTKVYSYRFVWWAISTAAMLYILYVLFFGFTSKAESMRPEVASTFKVLRNVTVVLWSAYPVVWLIGSEGAGIVPLNIETLLFMVLDVSAKVGFGLILLRSRAIFGEAEAPEPSAGDGAAATSD	WP_136361479
	3	Haloquadratum walsbyi bacteriorhodopsin (HwBR)	Haloquadratum walsbyi	Archaeon	MSQLALQMSSLGVEGEGIWLALGTIGMLLGMLYFIADGLDVQDPRQKEFYVITILIPAIAAASYLSMFFGFGLTEVSLANGRVVDVYWARYADWLFTTPLLLLDIGLLAGASQRDIGALVGIDAFMIVTGLVATLTKVVVARYAFWTISTISMVFLLYYLVAVFGEAVSDADEDTRSTFNALRNIILVTWAIYPVAWLVGTEGLALTGLYGETLLFMVLDLVAKVGFGFILLRSRAIMGGGSEPTPSAQETAAD	WP_011570311
	4	Middle rhodopsin (MR)	Haloquadratum walsbyi	Archaeon	MATPGSEATWLWIGTIGMVLGTVYFAVRGRGSTDPEQQTYYIITTLIPAIAAAAYLAMATGLGVISMPIRGTEVIDIYWARYADWLLTTPLLIIDLALVAGARKQTLYKLIIIDAIMILGGLAGSMMQQGAVIRIVWWAVSTAAFIILLYYLLGELSERARSRSAETGIVFNRLRNITLGLWALYPIVWILGTGGGFGIIAVTTEIMLYVMLDIGTKIGFGAVLLESQDVLQAASHPSSTNDIKSH	WP_011570314
	5	Rubrobacter xylanophilus rhodopsin (RxR)	Rubrobacter xylanophilus	Archaeon	MEALWLWIGFVGMLLGTLYFAFLLTNAPEGTRYFFVITATITGIAAIAYLVMATGSGSTVLPDGREFYWARYIDWVITTPLLLLDLCLLALADPRRNVTFIASLIALDVVMILTGLWAGATVNVAGRAILFIISTAAFIGVLYLLVSRLFAEASRRTPAVAQIFRTLAVLTIVLWICYPIVWLIGTEGFGAVSLSVEVFLFMVLDLLAKVGFGLLLLSSRQALSDIGSGAVAGTARRVA	WP_011564997
	6	Synechocystis halorhodopsin (SyHR)	Synechocystis sp. PCC 7509	Bacterium	MAQIWLWIGVIGMALGSIFFGIGAHNAKNERWKILFTINFFICAIATGLYLSMALGQGRSVIAGRPTVWVRYITWFLSTPLLILDLTFLGKTSLPITASLLGANAYMIATGFVATISADRTIGHIWYVVSCFAFLATVYLLVNQYRKQAERNYPQAKKVFRKLLSVHLVLWTLYPIVWLLGNTGFNAVNQGTETMFYTILDITSKVGFGFLSLNSMHTLEKNTESVSSYESSTI	WP_009632765
	7	Mastigocladopsis repens halorhodopsin (MrHR)	Mastigocladopsis repens	Bacterium	MTQAWLWIGVISMALGSVFFGFGAHNAKNERWQILYTLNFFICLIAAGLYLAMALGLGVNVINGRPTYWVRFVTWFCSTPLLLLDLTFLGRTSLPLTGSLLGANAYMLVTGFVATVTPKPMSYIWYIVSCAAYLAIVYLLAQPYRIAAERKHPRSKQAFRTLVTVHLVLWTLYPIVWILSPEGFSTFTQGSETMFYTLLDIASKVGFGFLSLNTLHTLEQATEPARETHLSY	WP_017314391
	8	Anabaena sensory rhodopsin (ASR)	Anabaena PCC7120	Bacterium	MNLESLLHWIYVAGMTIGALHFWSLSRNPRGVPQYEYLVAMFIPIWSGLAYMAMAIDQGKVEAAGQIAHYARYIDWMVTTPLLLLSLSWTAMQFIKKDWTLIGFLMSTQIVVITSGLIADLSERDWVRYLWYICGVCAFLIILWGIWNPLRAKTRTQSSELANLYDKLVTYFTVLWIGYPIVWIIGPSGFGWINQTIDTFLFCLLPFFSKVGFSFLDLHGLRNLNDSRQTTGDRFAENTLQFVENITLFANSRRQQSRRRV	WP_010997316
	9	Parvularcula oceani xenorhodopsin (PoXeR)	Parvularcula oceani	Bacterium	MTEAFWLWLYVAVMAAGACLFLYWSRKPRGVPGYEYTIAAVIPIWSGLAYLAMALGQGTVMIDGREVYYARYLDWLVTTPLLLWLLGSTATFYRANDTRLIGSLMFADVVMILSGLFADLTAEQSVRWLWYTIGCVSFLLILWQVWGPLRRIAGEQGEALSKTYTRVAAYLTVFWVSYPLVWLISPSGIGIVGPTVSIALFVILPAFSKVGFSILDLYELRRLGDDRPSPKAAIPPPAGHRAVVERPV	WP_051881467
	10	Rubricoccus marinus xenorhodopsin (RmXeR)	Rubricoccus marinus	Bacterium	MSLETLLYTVYIASMAAGALLFLSWMRDPKGVPVWEYIVAALIPVWSGLAYLAMALGLGTAEIAGQTTYWARYADWVVTTPLLLTALWMTAVTRSDKSKHVPLLLGLVSADIIMILCGLVGDLSSGPARYVYFGIGVAALVVVFALTWGPLRRVAEQDPEIGGIYRKVAAYLALFWIGYPLTWILGPSGLGIVGQTVDTTLFILLPIFSKVGFSIVDLGMLRAAGGTGCAAHE	WP_094549673
	11	Natronomonas pharaonis sensory rhodopsin II (NpSRII)	Natronomonas pharaonis	Archaeon	MVGLTTLFWLGAIGMLVGTLAFAWAGRDAGSGERRYYVTLVGISGIAAVAYAVMALGVGWVPVAERTVFVPRYIDWILTTPLIVYFLGLLAGLDSREFGIVITLNTVVMLAGFAGAMVPGIERYALFGMGAVAFIGLVYYLVGPMTESASQRSSGIKSLYVRLRNLTVVLWAIYPFIWLLGPPGVALLTPTVDVALIVYLDLVTKVGFGFIALDAAATLRAEHGESLAGVDTDTPAVAD	WP_011324120
	12	Halobacterium salinarum sensory rhodopsin II (HsSRII)	Halobacterium salinarum	Archaeon	MALTTWFWVGAVGMLAGTVLPIRDCIRHPSHRRYDLVLAGITGLAAIAYTTMGLGITATTVGDRTVYLARYIDWLVTTPLIVLYLAMLARPGHRTSAWLLAADVFVIAAGIAAALTTGVQRWLFFAVGAAGYAALLYGLLGTLPRALGDDPRVRSLFVTLRNITVVLWTLYPVVWLLSPAGIGILQTEMYTIVVVYLDFISKVAFVAFAVLGADAVSRLVAADAAAPATAEPTPDGD	CAP14279
	13	Salinibacter ruber sensory rhodopsin I (SrSRI)	Salinibacter ruber	Bacterium	MDPITIVYIIGTLGMLVGIPPALSLVGDEVGLDFDYVWAIPGIAAFMYLLMTFDVGSVQFQGYHVPIPRYIDWALTTPLLVGYTAYIAGASRGMIAGTALADFMMIVFGLGAVVFSSTAQWVFFGLSSACHLTLLALLYGPVRNSAFGEPPSHRRLARLLLNYVGLLWLAYPLVWLFGPGLQWVDAAGIAVIISYLDVTAKVPFVYFIYRARKNFVKVTGGEPETASGQGGAATVTSAA	WP_011405223
	14	Halobacterium salinarum sensory rhodopsin I (HsSRI)	Halobacterium salinarum	Archaeon	MDAVATAYLGGAVALIVGVAFVWLLYRSLDGSPHQSALAPLAIIPVFAGLSYVGMAYDIGTVIVNGNQIVGLRYIDWLVTTPILVGYVGYAAGASRRSIIGVMVADALMIAVGAGAVVTDGTLKWALFGVSSIFHLSLFAYLYVIFPRVVPDVPEQIGLFNLLKNHIGLLWLAYPLVWLFGPAGIGEATAAGVALTYVFLDVLAKVPYVYFFYARRRVFMHSESPPAPEQATVEATAAD	WP_010903211
	15	Leptosphaeria rhodopsin (LR)	Leptosphaeria maculans	Eukaryote	MIVDQFEEVLMKTSQLFPLPTATQSAQPTHVAPVPTVLPDTPIYETVGDSGSKTLWVVFVLMLIASAAFTALSWKIPVNRRLYHVITTIITLTAALSYFAMATGHGVALNKIVIRTQHDHVPDTYETVYRQVYYARYIDWAITTPLLLLDLGLLAGMSGAHIFMAIVADLIMVLTGLFAAFGSEGTPQKWGWYTIACIAYIFVVWHLVLNGGANARVKGEKLRSFFVAIGAYTLILWTAYPIVWGLADGARKIGVDGEIIAYAVLDVLAKGVFGAWLLVTHANLRESDVELNGFWANGLNREGAIRIGEDDGA	AAG01180
	16	Acetabularia rhodopsin I (ARI)	Acetabularia acetabulum	Eukaryote	MSNPNPFQTTLGTDAQWVVFAVMALAAIVFSIAVQFRPLPLRLTYYVNIAICTIAATAYYAMAVNGGDNKPTAGTGADERQVIYARYIDWVFTTPLLLLDLVLLTNMPATMIAWIMGADIAMIAFGIIGAFTVGSYKWFYFVVGCIMLAVLAWGMINPIFKEELQKHKEYTGAYTTLLIYLIVLWVIYPIVWGLGAGGHIIGVDVEIIAMGILDLLAKPLYAIGVLITVEVVYGKLGKEEAQPLTA	AEF12206
	17	Natronomonas pharaonis halorhodopsin (NpHR)	Natronomonas pharaonis	Archaeon	MTETLPPVTESAVALQAEVTQRELFEFVLNDPLLASSLYINIALAGLSILLFVFMTRGLDDPRAKLIAVSTILVPVVSIASYTGLASGLTISVLEMPAGHFAEGSSVMLGGEEVDGVVTMWGRYLTWALSTPMILLALGLLAGSNATKLFTAITFDIAMCVTGLAAALTTSSHLMRWFWYAISCACFIVVLYILLVEWAQDAKAAGTADIFSTLKLLTVVMWLGYPIVWALGVEGVAVLPVGYTSWAYSALDIVAKYIFAFLLLNYLTSNEGVVSGSILDVPSASGAPADD	CAI48412
	18	Halobacterium salinarum halorhodopsin (HsHR)	Halobacterium salinarum	Archaeon	MSITSVPGVVDAGVLGAQSAAAVRENALLSSSLWVNVALAGIAILVFVYMGRTIRPGRPRLIWGATLMIPLVSISSYLGLLSGLTVGMIEMPAGHALAGEMVRSQWGRYLTWALSTPMILLALGLLADVDLGSLFTVIAADIGMCVTGLAAAMTTSALLFRWAFYAISCAFFVVVLSALVTDWAASASSAGTAEIFDTLRVLTVVLWLGYPIVWAVGVEGLALVQSVGVTSWAYSVLDVFAKYVFAFILLRWVANNERTVAVAGQTLGTMSSDD	WP_010902090
	19	Blastocladiella emersonii rhodopsin-guanylyl cyclase (BeRhGC)	Blastocladiella emersonii	Eukaryote	MKDKDNNLRGACSSCNCPEYCFSPTSTLCDDCKCSVTKHPIVEQPLSRNGSFRSSGASLLPSPSSPNVKITSTVGLRSRKSESQANVRGSMISNSNSGSRSNNSGGAGGGSGGSSSSKGGSALANYQSAMSELWSWNMMLSTPSLKFLTVQFTTWIVLTTVGAIYTLFFHERQAYNRGWADIWYGYGAFGFGLGLSFAYMGFTGARNPEKKALSLCLLGVNFISFMSYIIIMLRLTPTIEGTMANPVEPARYLEWIATCPVLILLISEITQYPHDPYKVIVNDYALCLAGFVGAISAQQPWGDLAHFVSCLCFSYVVYSLWSCFTGAIDGETQCNVEKSGLRWIRFSTITTWSLFPITWFSYTSGLISFTVAEAGFSMIDIGAKVFLTLVLVNSTVEQA…	AIC07007
	20	Salpingoeca rosetta rhodopsin-cyclic nucleotide phosphodiesterase (SrRhPDE)	Salpingoeca rosetta	Eukaryote	MGRKNAANSSMLQEASMNNYSMTSAASGASSSGRGKRRAKTRNIAIASTKEVQWQGIFMIIVWLCVMGSLIFFANPEASRRVFAKFSHLQSFYGATSVAFAFATGLDILAYVNAVSDEKRVLSGILAYVDGVACISYLSMATLNLYFLVDSTQGNPVWLMRYAEWIITCPTLLYWCGLASRADRSSVSDIATADALLLAGGALSSILPSWPAFFVFAGSFATYIYVMLHMWGMFGKAMQPDFQPPPPLPRHALHLLRCEIVMSWSIFPLVEFLRRQGYIDFQVGEAMNCVADYAAKVGLAMIMVNCNLEQINALRVQQMHSALTGMLKVMRKTNLSSSRMAQLDGVDDDVKSWIMNEFSGSTDGKGGDDAKAQQRARGRKGHSAAMDAEKLAASSLFTW…	XP_004998010
	21	Proteorhodopsin (PR)	Marine gamma proteobacterium	Bacterium	MKLLLILGSVIALPTFAAGGGDLDASDYTGVSFWLVTAALLASTVFFFVERDRVSAKWKTSLTVSGLVTGIAFWHYMYMRGVWIETGDSPTVFRYIDWLLTVPLLICEFYLILAAATNVAGSLFKKLLVGSLVMLVFGYMGEAGIMAAWPAFIIGCLAWVYMIYELWAGEGKSACNTASPAVQSAYNTMMYIIIFGWAIYPVGYFTGYLMGDGGSALNLNLIYNLADFVNKILFGLIIWNVAVKESSNA	AAG10475
	22	Gloeobacter rhodopsin (GR)	Gloeobacter violaceus	Bacterium	MLMTVFSSAPELALLGSTFAQVDPSNLSVSDSLTYGQFNLVYNAFSFAIAAMFASALFFFSAQALVGQRYRLALLVSAIVVSIAGYHYFRIFNSWDAAYVLENGVYSLTSEKFNDAYRYVDWLLTVPLLLVETVAVLTLPAKEARPLLIKLTVASVLMIATGYPGEISDDITTRIIWGTVSTIPFAYILYVLWVELSRSLVRQPAAVQTLVRNMRWLLLLSWGVYPIAYLLPMLGVSGTSAAVGVQVGYTIADVLAKPVFGLLVFAIALVKTKADQESSEPHAAIGAAANKSGGSLIS	WP_011140202
	23	Xanthorhodopsin (XR)	Salinibacter ruber	Bacterium	MLQELPTLTPGQYSLVFNMFSFTVATMTASFVFFVLARNNVAPKYRISMMVSALVVFIAGYHYFRITSSWEAAYALQNGMYQPTGELFNDAYRYVDWLLTVPLLTVELVLVMGLPKNERGPLAAKLGFLAALMIVLGYPGEVSENAALFGTRGLWGFLSTIPFVWILYILFTQLGDTIQRQSSRVSTLLGNARLLLLATWGFYPIAYMIPMAFPEAFPSNTPGTIVALQVGYTIADVLAKAGYGVLIYNIAKAKSEEEGFNVSEMVEPATASA	WP_011404249
	24	Thermophilic rhodopsin (TR)	Thermus thermophilus	Bacterium	MRMLPELSFGEYWLVFNMLSLTIAGMLAAFVFFLLARSYVAPRYHIALYLSALIVFIAGYHYLRIFESWVGAYQLQDGVYVPTGKPFNDFYRYADWLLTVPLLLLELILVLGLTAARTWNLSIKLVVASVLMLALGYVGEVNTEPGPRTLWGALSSIPFFYILYVLWVELGQAIREAKFGPRVLELLGATRLVLLMSWGFYPIAYALGTWLPGGAAQEVAIQIGYSLADLIAKPIYGLLVFAIARAKSLEEGFGVEAKAA	WP_014629850
	25	Nonlabens marinus rhodopsin-3 (NMR-3)	Nonlabens marinus	Bacterium	MKNIESLFDYSAGQFEFIDHLLTMGVGVHFAALIFFLVVSQFVAPKYRIATALSCIVMVSAGLILNSQAVMWTDAYAYVDGSYQLQDLTFSNGYRYVNWMATIPCLLLQLLIVLNLKGKELFSTATWLILAAWGMIITGYVGQLYEVDDIAQLMIWGAVSTAFFVVMNWIVGTKIFKNRATMLGGTDSTITKVFWLMMFAWTLYPIAYLVPAFMNNADGVVLRQLLFTIADISSKVIYGLMITYIAIQQSAAAGYVPAQQALGRIGMDSKAA	BAO55276
	26	Fulvimarina rhodopsin (FR)	Fulvimarina pelagi	Bacterium	MQDTELFADQLGNIENLVSLTVGQYTMGSLILMVSYGAHFAFVLYFLMTSLQLAPRYRIVPIMSAIVMVSAGLSLLREFNAWEQSYEFVEGMYQPLAENSTFTNAYRYGNWTITVPILLTQLPLAFGLLRPELHVRAARMCIPALLMIWTGLVGQFGETGNYLRLNVWGVISTIFFVWLIIEVRGVISRAIAMGPAELAAWPKNIWWFFLAFWGLYPIAYALPQLGHTGDIVVIRQLLYSIADVFSKLVYGIILSRYVLRRSALEGYKPAIEALSRTPVDLSMSKNGGAGYGDGDR	WP_007065598
	27	Krokinobacter rhodopsin 2 (KR2)	Krokinobacter eikastus	Bacterium	MTQELGNANFENFIGATEGFSEIAYQFTSHILTLGYAVMLAGLLYFILTIKNVDKKFQMSNILSAVVMVSAFLLLYAQAQNWTSSFTFNEEVGRYFLDPSGDLFNNGYRYLNWLIDVPMLLFQILFVVSLTTSKFSSVRNQFWFSGAMMIITGYIGQFYEVSNLTAFLVWGAISSAFFFHILWVMKKVINEGKEGISPAGQKILSNIWILFLISWTLYPGAYLMPYLTGVDGFLYSEDGVMARQLVYTIADVSSKVIYGVLLGNLAITLSKNKELVEANS	BAN14808
	28	Gillisia limnaea rhodopsin (GLR)	Gillisia limnaea	Bacterium	MFGDFNRVDNPILSLSYFKIQLTGIGLCRLLKPCLNFSKNIKHIKKFIKINGNKFEIDYFDMTQELGNANFENFIGATEGFSEIAYQFTSHILTLGYAVMLAGLLYFILTIKKVDKKYQMSNILSAVVMVSAFLLLYAQAENWTTSFTFDISRGKYFLEPNGDLFNNGYRYLNWLIDVPMLLFQILFVVSLTKSKFSSIRNQFWFSGAMMIITGYIGQFYEVSNLTAFFVWGAISSVFFFHILWVMKKVINEGKEGLSADAQKILSNIWVLFLVSWFLYPGAYLMPYLTGLDGFFFSEDGVMARQLTYTIADVCSKVIYGVLLGNLALKLSNNKEMVELSN	EHQ02967
	29	Guillardia theta anion channelrhodopsin 1 (GtACR1)	Guillardia theta	Eukaryote	MSSITCDPAIYGEWSRENQFCVEKSLITLDGIKYVQLVMAVVSACQVFFMVTRAPKVPWEAIYLPTTEMITYSLAFTGNGYIRVANGKYLPWARMASWLCTCPIMLGLVSNMALVKYKSIPLNPMMIAASSICTVFGITASVVLDPLHVWLYCFISSIFFIFEMVVAFAIFAITIHDFQTIGSPMSLKVVERLKLMRIVFYVSWMAYPILWSFSSTGACIMSENTSSVLYLLGDALCKNTYGILLWATTWGLLNGKWDRDYVKGRNVDGTLMPEYEQDLEKGNTERYEDARAGET	KP171708
	30	Guillardia theta anion channelrhodopsin 2 (GtACR2)	Guillardia theta	Eukaryote	MASQVVYGEWASTHTECYNMSRIDSTFVSLLQLVWAVVSGCQTIFMISRAPKVPWESVYLPFVESITYALASTGNGTLQMRDGRFFPWSRMASWLCTCPIMLGQISNMALVKYKSIPLNPIAQAASIIRVVMGITATISPAEYMKWLFFFFGATCLVFEYSVVFTIFQVGLYGFESVGTPLAQKVVVRIKMLRLIFFIAWTMFPIVWLISPTGVCVIHENVSAILYLLADGLCKNTYGVILWSTAWGVLEGKWDPACLPGQEKPEADDPFGLNHEKNAPPNDEVNIRMFGR	KP171709
	31	Chlamydomonas reinhardtii channelrhodopsin 1 (CrChR1)	Chlamydomonas reinhardtii	Eukaryote	MSRRPWLLALALAVALAAGSAGASTGSDATVPVATQDGPDYVFHRAHERMLFQTSYTLENNGSVICIPNNGQCFCLAWLKSNGTNAEKLAANILQWITFALSALCLMFYGYQTWKSTCGWEEIYVATIEMIKFIIEYFHEFDEPAVIYSSNGNKTVWLRYAEWLLTCPVILIHLSNLTGLANDYNKRTMGLLVSDIGTIVWGTTAALSKGYVRVIFFLMGLCYGIYTFFNAAKVYIEAYHTVPKGICRDLVRYLAWLYFCSWAMFPVLFLLGPEGFGHINQFNSAIAHAILDLASKNAWSMMGHFLRVKIHEHILLYGDIRKKQKVNVAGQEMEVETMVHEEDDETQKVPTAKYANRDSFIIMRDRLKEKGFETRASLDGDPNGDAEANAAAGGKPGME…	AAL08946
	32	Chlamydomonas reinhardtii channelrhodopsin 2 (CrChR2)	Chlamydomonas reinhardtii	Eukaryote	MDYGGALSAVGRELLFVTNPVVVNGSVLVPEDQCYCAGWIESRGTNGAQTASNVLQWLAAGFSILLLMFYAYQTWKSTCGWEEIYVCAIEMVKVILEFFFEFKNPSMLYLATGHRVQWLRYAEWLLTCPVILIHLSNLTGLSNDYSRRTMGLLVSDIGTIVWGATSAMATGYVKVIFFCLGLCYGANTFFHAAKAYIEGYHTVPKGRCRQVVTGMAWLFFVSWGMFPILFILGPEGFGVLSVYGSTVGHTIIDLMSKNCWGLLGHYLRVLIHEHILIHGDIRKTTKLNIGGTEIEVETLVEDEAEAGAVNKGTGKYASRESFLVMRDKMKEKGIDVRASLDNSKEVEQEQAARAAMMMMNGNGMGMGMGMNGMNGMGGMNGMAGGAKPGLELTPQLQPG…	AAM15777
